# Supplementary material for: Trpm5 channels encode bistability of spinal motoneurons and ensure motor control of hindlimbs in mice
Source: PubMed Central journal article supplement (PMC8613399; doi:10.1038/s41467-021-27113-x), 2021-11-24
Supplement: 41467_2021_27113_MOESM3_ESM.pdf [file 41467_2021_27113_MOESM3_ESM.pdf]

## Description of Additional Supplementary Files

File Name: Supplementary Movie 1

Description: *Trpm5*<sup>-/-</sup> mice display prolonged latency of the righting reflex compared to controls.

File Name: Supplementary Movie 2

Description: *Trpm5*<sup>-/-</sup> mice (P12) display a decreased swimming performance compared to controls.

File Name: Supplementary Movie 3

Description: *Trpm5*-ShRNA mice (P11) display strong deficits in the postural tone of hindlimbs compared to control-ShRNA.

File Name: Supplementary Movie 4

Description: *Trpm5*-ShRNA mice (P10) display strong deficits in the righting reflex compared to control-ShRNA.

File Name: Supplementary Movie 5

Description: *Trpm5*-ShRNA mice (P12) display a decreased swimming performance compared to control-ShRNA.
